# Supplementary material
Source: Copernicus journal article supplement (doi:10.5194/egusphere-2026-841)
Supplement: Supplementary file [file Supplementary_Material.pdf › Supplementary_Material.pdf]

### Supplementary Table

Table S1 (a) Circum-Arctic permafrost region

Bootstrap Path Coefficient Validation

| Path       | Std.Error | 95% CI             |
|------------|-----------|--------------------|
| TOPO → ALT | 0.035     | [-0.27, -0.13]     |
| TEMP → ALT | 0.041     | [0.29, 0.45]       |
| TP → ALT   | 0.0340    | [0.1427, 0.2805]   |
| SD → ALT   | 0.0393    | [-0.2584, -0.1139] |
| Soil → ALT | 0.0444    | [0.3041, 0.4710]   |
| NDVI → ALT | 0.0369    | [-0.2212, -0.0822] |

Table S1 (b) Bootstrap Validation of Total Effects on ALT

| Path       | Std.Error | 95% CI           |
|------------|-----------|------------------|
| TOPO → ALT | 0.029     | [-0.139, -0.030] |
| TEMP → ALT | 0.029     | [0.270, 0.379]   |
| TP → ALT   | 0.037     | [0.146, 0.292]   |
| SD → ALT   | 0.022     | [0.082, 0.167]   |
| Soil → ALT | 0.042     | [0.301, 0.468]   |
| NDVI → ALT | 0.042     | [-0.239, -0.073] |

Table S1 (c) CR & AVE Table

| Latent Variable | Number of Items | Composite Reliability (CR) | Average Variance Extracted (AVE) |
|-----------------|-----------------|----------------------------|----------------------------------|
| TOPO            | 2               | 0.694                      | 0.541                            |
| TEMP            | 2               | 0.873                      | 0.774                            |
| Soil            | 3               | 0.855                      | 0.665                            |

Table S1 (d) HTMT Table

| Latent Variable | Topography | Temperature | Soil  |
|-----------------|------------|-------------|-------|
| TOPO            | 1          | 0.276       | 0.898 |
| TEMP            | 0.276      | 1           | 0.268 |
| Soil            | 0.898      | 0.268       | 1     |

Table S1 (e) Effect Size Analysis (Cohen's f<sup>2</sup>)

| Effect Type    | Predictor Variable | Cohen's f <sup>2</sup> |
|----------------|--------------------|------------------------|
| Overall effect | Model total        | 0.518                  |
| Local effect   | TOPO               | 0.064                  |
| Local effect   | TEMP               | 0.185                  |
| Local effect   | TP                 | 0.067                  |
| Local effect   | SD                 | 0.045                  |
| Local effect   | Soil               | 0.220                  |
| Local effect   | NDVI               | 0.026                  |

Sub-Circum-Arctic permafrost region

Table S2 (a) Bootstrap Path Coefficient Validation

| Path       | Std.Error | 95% CI             |
|------------|-----------|--------------------|
| TOPO → ALT | 0.048     | [-0.4994, -0.3227] |
| TP → ALT   | 0.034     | [0.3331, 0.4648]   |
| Soil → ALT | 0.0409    | [0.1979, 0.3522]   |
| NDVI → ALT | 0.0362    | [0.2487, 0.3756]   |

Table S2 (b) Bootstrap Validation of Total Effects on ALT

| Path       | Std.Error | 95% CI             |
|------------|-----------|--------------------|
| TOPO → ALT | 0.0317    | [-0.4674, -0.3426] |
| TEMP → ALT | 0.0285    | [-0.0439, 0.0627]  |
| TP → ALT   | 0.0311    | [0.3066, 0.4282]   |
| SD → ALT   | 0.0233    | [-0.1074, -0.0146] |
| Soil → ALT | 0.0409    | [0.1979, 0.3522]   |
| NDVI → ALT | 0.0362    | [0.2487, 0.3756]   |

Table S2 (c) CR & AVE Table

| Latent Variable | Number of Items | Composite Reliability (CR) | Average Variance Extracted (AVE) |
|-----------------|-----------------|----------------------------|----------------------------------|
| TOPO            | 2               | 0.722                      | 0.572                            |
| TEMP            | 2               | 0.907                      | 0.830                            |
| Snow            | 2               | 0.922                      | 0.855                            |

Table S2 (d) HTMT Table

| Latent Variable | TOPO  | TEMP  | Snow  |
|-----------------|-------|-------|-------|
| TOPO            | 1     | 0.186 | 0.377 |
| TEMP            | 0.186 | 1     | 0.732 |
| Snow            | 0.377 | 0.732 | 1     |

Table S2 (e) Effect Size Analysis (Cohen's f<sup>2</sup>)

| Effect Type    | Predictor Variable | Cohen's f <sup>2</sup> |
|----------------|--------------------|------------------------|
| Overall effect | Model total        | 0.566                  |
| Local effect   | TOPO               | 0.261                  |
| Local effect   | TP                 | 0.248                  |
| Local effect   | Soil               | 0.113                  |
| Local effect   | NDVI               | 0.154                  |

QTP

Table S3 (a) Bootstrap Path Coefficient Validation

| Path       | Std.Error | 95% CI             |
|------------|-----------|--------------------|
| Asp → ALT  | 0.0647    | [-0.6382, -0.3730] |
| Snow → ALT | 0.0491    | [-0.2446, -0.0533] |
| Soil → ALT | 0.0757    | [0.2520, 0.5446]   |
| NDVI → ALT | 0.0641    | [0.0606, 0.2952]   |

Table S3 (b) Bootstrap Validation of Total Effects on ALT

| Path       | Std.Error | 95% CI             |
|------------|-----------|--------------------|
| Asp → ALT  | 0.0474    | [-0.4209, -0.2419] |
| TEMP → ALT | 0.0394    | [0.1129, 0.2715]   |
| TP → ALT   | 0.0510    | [-0.1859, 0.0114]  |
| Snow → ALT | 0.0461    | [-0.2002, -0.0248] |
| Soil → ALT | 0.0757    | [0.2520, 0.5446]   |
| NDVI → ALT | 0.0641    | [0.0606, 0.2952]   |

Table S3 (c) CR &amp; AVE Table

| Latent Variable | Number of Items | Composite Reliability (CR) | Average Variance Extracted (AVE) |
|-----------------|-----------------|----------------------------|----------------------------------|
| Soil            | 2               | 0.809                      | 0.680                            |
| TEMP            | 2               | 0.941                      | 0.889                            |
| Snow            | 2               | 0.910                      | 0.835                            |

Table S3 (d) HTMT Table

| Latent Variable | TEMP  | Snow  | Soil  |
|-----------------|-------|-------|-------|
| TEMP            | 1     | 0.494 | 0.453 |
| Snow            | 0.494 | 1     | 0.489 |
| Soil            | 0.453 | 0.489 | 1     |

Table S3 (e) Effect Size Analysis (Cohen's  $f^2$ )

| Effect Type    | Predictor Variable | Cohen's $f^2$ |
|----------------|--------------------|---------------|
| Overall effect | Model total        | 0.337         |
| Local effect   | Asp                | 0.056         |
| Local effect   | Snow               | 0.039         |
| Local effect   | Soil               | 0.194         |
| Local effect   | NDVI               | 0.023         |

### References for ALT sites compiled from published literature

The following references correspond to the 136 additional ALT sites compiled from published literature, as described in Section 2.2 of the main manuscript.

#### The literature sources utilized for extracting ALT data in this study

- Beermann, F., Langer, M., Wetterich, S., Strauss, J., Boike, J., Fiencke, C., Schirrmeister, L., Pfeiffer, E.-M., and Kutzbach, L., 2017, Permafrost Thaw and Liberation of Inorganic Nitrogen in Eastern Siberia: Permafrost and Periglacial Processes, v. 28, no. 4, p. 605-618. <http://dx.doi.org/10.1002/ppp.1958>
- Blok, D., Heijmans, M., Schaepman-Strub, G., Kononov, A. V., Maximov, T. C., and Berendse, F., 2010, Shrub expansion may reduce summer permafrost thaw in Siberian

- tundra: *Global Change Biology*, v. 16, no. 4, p. 1296-1305.<http://dx.doi.org/10.1111/j.1365-2486.2009.02110.x>
- Cable, J. M., Ogle, K., Bolton, W. R., Bentley, L. P., Romanovsky, V., Iwata, H., Harazono, Y., and Welker, J., 2014, Permafrost thaw affects boreal deciduous plant transpiration through increased soil water, deeper thaw, and warmer soils: *Ecohydrology*, v. 7, no. 3, p. 982-997.<http://dx.doi.org/10.1002/eco.1423>
- Carey, J. C., Abbott, B. W., and Rocha, A. V., 2019, Plant Uptake Offsets Silica Release From a Large Arctic Tundra Wildfire: Earth's Future.<http://dx.doi.org/10.1029/2019ef001149>
- Chang, X., Jin, H., He, R., Jing, H., Li, G., Wang, Y., Luo, D., Yu, S., and Sun, H., 2013, Review of Permafrost Monitoring in the Northern Da Hinggan Mountains, Northeast China: *Journal of Glaciology and Geocryology*, v. 35, no. 1, p. 93-100.<http://dx.doi.org/10.7522/j.issn.1000-0240.2013.0011> (In Chinese)
- Chang, X., Jin, H., He, R., Zhang, Y., Li, X., Jin, X., and Li, G., 2022, Permafrost changes in the northwestern Da Xing'anling Mountains, Northeast China, in the past decade: *Earth System Science Data*, v. 14, no. 9, p. 3947-3959.<http://dx.doi.org/10.5194/essd-14-3947-2022>
- Chang, X., Tie, L., Jin, H., He, R., Li, X., and Wang, Y., 2020, The features of permafrost in Xinlin forest area on eastern slope of the Greater Khingan Mountains: *Journal of Glaciology and Geocryology*, v. 42, no. 3, p. 823-833.<http://dx.doi.org/10.7522/j.issn.1000-0240.2020.0063> (In Chinese)
- Che, L., Cheng, M., Xing, L., Cui, Y., and Wan, L., 2022, Effects of permafrost degradation

- on soil organic matter turnover and plant growth: *Catena*, v. 208. <http://dx.doi.org/10.1016/j.catena.2021.105721>
- Chen, A., Parsekian, A. D., Schaefer, K., Jafarov, E., Panda, S., Liu, L., Zhang, T., and Zebker, H., 2016, Ground-penetrating radar-derived measurements of active-layer thickness on the landscape scale with sparse calibration at Toolik and Happy Valley, Alaska: *Geophysics*, v. 81, no. 2, p. H9-H19. <http://dx.doi.org/10.1190/geo2015-0124.1>
- Desyatkin, R. V., and Desyatkin, A. R., 2019, The Effect of Increasing Active Layer Depth on Changes in the Water Budget in the Cryolithozone: *Eurasian Soil Science*. <http://dx.doi.org/10.1134/S1064229319110036>
- Ebel, B. A., Koch, J. C., and Walvoord, M. A., 2019, Soil Physical, Hydraulic, and Thermal Properties in Interior Alaska, USA: Implications for Hydrologic Response to Thawing Permafrost Conditions: *Water Resources Research*. <http://dx.doi.org/10.1029/2018wr023673>
- Feng, X., Duan, L., Kurylyk, B. L., and Cai, T., 2022, Impacts of permafrost thaw on streamflow recession in a discontinuous permafrost watershed of northeastern China: *Science of the Total Environment*, v. 847. <http://dx.doi.org/10.1016/j.scitotenv.2022.157624>
- Feng, X., Zhang, Y., and Chang, X., 2021, Analysis of heat and water transferring characteristics in the active layer of permafrost in the wetland of the Greater Khingan Mountains: *Journal of Glaciology and Geocryology*, v. 43, no. 5, p. 1468-1479. <http://dx.doi.org/10.7522/j.issn.1000-0240.2021.0098> (In Chinese)
- Fisher, J. P., Estop-Aragones, C., Thierry, A., Charman, D. J., Wolfe, S. A., Hartley, I. P.,

- Murton, J. B., Williams, M., and Phoenix, G. K., 2016, The influence of vegetation and soil characteristics on active-layer thickness of permafrost soils in boreal forest: *Global Change Biology*, v. 22, no. 9, p. 3127-3140.<http://dx.doi.org/10.1111/gcb.13248>
- Gagnon, S., and Allard, M., 2020, Changes in ice-wedge activity over 25 years of climate change near Salluit, Nunavik (northern Quebec, Canada): *Permafrost and Periglacial Processes*, v. 31, no. 1, p. 69-84.<http://dx.doi.org/10.1002/ppp.2030>
- Gagnon, S., and Allard, M., 2021, Modeled (1990-2100) variations in active-layer thickness and ice-wedge activity near Salluit, Nunavik (Canada): *Permafrost and Periglacial Processes*, v. 32, no. 3, p. 447-467.<http://dx.doi.org/10.1002/ppp.2109>
- Garibaldi, M. C., Bonnaventure, P. P., Smith, S. L., and Duchesne, C., 2022, Active layer variability and change in the Mackenzie Valley, Northwest Territories between 1991-2014: An ecoregional assessment: *Arctic, Antarctic, and Alpine Research*, v. 54, no. 1, p. 274-293.<http://dx.doi.org/10.1080/15230430.2022.2097156>
- Gibson, C. M., Chasmer, L. E., Thompson, D. K., Quinton, W. L., Flannigan, M. D., and Olefeldt, D., 2018, Wildfire as a major driver of recent permafrost thaw in boreal peatlands: *Nature Communications*, v. 9.<http://dx.doi.org/10.1038/s41467-018-05457-1>
- Grebenets, V. I., Tolmanov, V. A., and Streletskiy, D. A., 2021, ACTIVE LAYER DYNAMICS NEAR NORILSK, TAIMYR PENINSULA, RUSSIA: *Geography, Environment, Sustainability*, v. 14, no. 4, p. 55-66.<http://dx.doi.org/10.24057/2071-9388-2021-073>

- Gu, Z., 1994, THE EFFECTS OF CLIMATE WARMING AND HUMAN TURBULENCE ON THE PERMAFROST IN THE NORTHWARD SLOPE OF MT. DA HINGGAN LING-TAKE A SAMPLE FROM AMUR AREA: *Acta Geographica Sinica*, no. 02, p. 182-187.(In Chinese)
- Guo, J., Han, F., Hu, Y., Nie, Z., Ren, B., and Bu, R., 2017, Ecological characteristics of vegetation and their responses to permafrost degradation in the north slope of Great Khingan Mountain valley of northeast China: *Acta Ecologica Sinica*, v. 37, no. 19, p. 6552-6561.<http://dx.doi.org/10.5846/stxb201607021363> (In Chinese)
- He, R. X., Jin, H. J., Luo, D. L., Li, X. Y., Zhou, C. F., Jia, N., Jin, X. Y., Li, X. Y., Che, T., Yang, X., Wang, L. Z., Li, W. H., Wei, C. L., Chang, X. L., and Yu, S. P., 2021, Permafrost changes in the Nanwenghe Wetlands Reserve on the southern slope of the Da Xing'anling–Yile'huli mountains, Northeast China: *Advances in Climate Change Research*, v. 12, no. 5, p. 696-709.<http://dx.doi.org/10.1016/j.accre.2021.06.007>
- Hinkel, K. M., Nelson, F. E., Shur, Y., Brown, J., and Everett, K. R., 1996, Temporal changes in moisture content of the active layer and near-surface permafrost at Barrow, Alaska, USA: 1962-1994: *Arctic and Alpine Research*, v. 28, no. 3, p. 300-310.<http://dx.doi.org/10.2307/1552109>
- Hinkel, K. M., Paetzold, F., Nelson, F. E., and Bockheim, J. G., 2001, Patterns of soil temperature and moisture in the active layer and upper permafrost at Barrow, Alaska: 1993-1999: *Global and Planetary Change*, v. 29, no. 3-4, p. 293-309.[http://dx.doi.org/10.1016/s0921-8181\(01\)00096-0](http://dx.doi.org/10.1016/s0921-8181(01)00096-0)
- Hofle, C., Ping, C. L., and Kimble, J. M., 1998, Properties of permafrost soils on the northern

- Seward Peninsula, Northwest Alaska: Soil Science Society of America Journal, v. 62, no. 6, p. 1629-1639.<http://dx.doi.org/10.2136/sssaj1998.03615995006200060021x>
- Hou, C., Xie, F., Li, X., and Xiao, D., 2010, Changes of permafrost active layer in greater Khingan Mountains under fire disturbance: Journal of University of Ji'nan: Science and Technology, v. 24, no. 3, p. 277-281.<http://dx.doi.org/10.7632/J.ISSN:1671-3559.2010.03.014> (In Chinese)
- Huang, S., Din, L., Ding, Q., Hu, Z., Wang, H., and Chen, K., 2022, Simulation on Thermal State of Frozen Ground in Daxing'an Mountains: Journal of North-East Forestry University, v. 50, no. 1, p. 77-81,92.<http://dx.doi.org/10.13759/j.cnki.dlxb.2022.01.017> (In Chinese)
- Hubbard, S. S., Gangodagamage, C., Dafflon, B., Wainwright, H., Peterson, J., Gusmeroli, A., Ulrich, C., Wu, Y., Wilson, C., Rowland, J., Tweedie, C., and Wulschleger, S. D., 2013, Quantifying and relating land-surface and subsurface variability in permafrost environments using LiDAR and surface geophysical datasets: Hydrogeology Journal, v. 21, no. 1, p. 149-169.<http://dx.doi.org/10.1007/s10040-012-0939-y>
- Iwahana, G., Harada, K., Uchida, M., Tsuyuzaki, S., Saito, K., Narita, K., Kushida, K., and Hinzman, L. D., 2016, Geomorphological and geochemistry changes in permafrost after the 2002 tundra wildfire in Kougarok, Seward Peninsula, Alaska: Journal of Geophysical Research-Earth Surface, v. 121, no. 9, p. 1697-1715.<http://dx.doi.org/10.1002/2016jf003921>
- Jafarov, E. E., Parsekian, A. D., Schaefer, K., Liu, L., Chen, A. C., Panda, S. K., and Zhang, T., 2017, Estimating active layer thickness and volumetric water content from ground

- penetrating radar measurements in Barrow, Alaska: *Geoscience Data Journal*, v. 4, no. 2, p. 72-79. <http://dx.doi.org/10.1002/gdj3.49>
- Jean, M., and Payette, S., 2014, Dynamics of active layer in wooded palsas of northern Quebec: *Geomorphology*, v. 206, p. 87-96. <http://dx.doi.org/10.1016/j.geomorph.2013.10.001>
- Jin, H., Yu, S., Lu, L., Guo, D., and Li, Y., 2006, Degradation of Permafrost in the Da and Xiao Hinggan Mountains, Northeast China, and Preliminary Assessment of Its Trend: *Journal of Glaciology and Geocryology*, v. 28, no. 4, p. 467-476. <http://dx.doi.org/10.7522/j.issn.1000-0240.2006.0068> (In Chinese)
- Kasper, J. N., 1997, Geomorphic, geophysical and quaternary studies of ice and soil wedge features in the Foucault River valley, Northern Quebec.
- Kim, K., Lee, J., Ju, H., Jung, J. Y., Chae, N., Chi, J., Kwon, M. J., Lee, B. Y., Wagner, J., and Kim, J.-S., 2021, Time-lapse electrical resistivity tomography and ground penetrating radar mapping of the active layer of permafrost across a snow fence in Cambridge Bay, Nunavut Territory, Canada: correlation interpretation using vegetation and meteorological data: *Geosciences Journal*, v. 25, no. 6, p. 877-890. <http://dx.doi.org/10.1007/s12303-021-0021-7>
- Kirilyanov, A. V., Saurer, M., Siegwolf, R., Knorre, A. A., Prokushkin, A. S., Churakova, O. V., Fonti, M. V., and Büntgen, U., 2020, Long-term ecological consequences of forest fires in the continuous permafrost zone of Siberia: *Environmental Research Letters*. <http://dx.doi.org/10.1088/1748-9326/ab7469>
- Köster, E., Köster, K., Berninger, F., Prokushkin, A., Aaltonen, H., Zhou, X., and Pumpanen,

- J., 2018, Changes in fluxes of carbon dioxide and methane caused by fire in Siberian boreal forest with continuous permafrost: Journal of Environmental Management. <http://dx.doi.org/10.1016/j.jenvman.2018.09.051>
- Leger, E., Dafflon, B., Robert, Y., Ulrich, C., Peterson, J. E., Biraud, S. C., Romanovsky, V. E., and Hubbard, S. S., 2019, A distributed temperature profiling method for assessing spatial variability in ground temperatures in a discontinuous permafrost region of Alaska: Cryosphere, v. 13, no. 11, p. 2853-2867. <http://dx.doi.org/10.5194/tc-13-2853-2019>
- Lewkowicz, A. G., and Harris, C., 2005, Morphology and geotechnique of active-layer detachment failures in discontinuous and continuous permafrost, northern Canada: Geomorphology, v. 69, no. 1-4, p. 275-297. <http://dx.doi.org/10.1016/j.geomorph.2005.01.011>
- Li, X., Jin, H., Wang, H., Jin, X., Bense, V. F., Marchenko, S. S., He, R., Huang, Y., and Luo, D., 2022, Effects of fire history on thermal regimes of permafrost in the northern Da Xing'anling Mountains, NE China: Geoderma, v. 410. <http://dx.doi.org/10.1016/j.geoderma.2021.115670>
- Liang, L., Zhou, Y., Wang, J., and Gao, X., 1991, Changes of the Permafrost Environment in Great Xian Ridges After Disastrous Forest Fire -Takeing Gulian Mining area an example: Journal of Glaciology and Geocryology, no. 01, p. 17-25.(In Chinese)
- Lloyd, A. H., Yoshikawa, K., Fastie, C. L., Hinzman, L., and Fraver, M., 2003, Effects of permafrost degradation on woody vegetation at arctic treeline on the Seward Peninsula, Alaska: Permafrost and Periglacial Processes, v. 14, no. 2, p.

93-101.<http://dx.doi.org/10.1002/ppp.446>

- Lu, J., Xiuzhen, L. I., Yuanman, H. U., Xianwei, W., Hongjuan, L. I. U., and Longfei, B., 2007, Factors affecting the thickness of permafrost's active layer in Huzhong National Nature Reserve: Chinese Journal of Ecology, v. 26, no. 9, p. 1369-1374.<http://dx.doi.org/10.13292/j.1000-4890.2007.0240> (In Chinese)
- Mackay, J. R., and Burn, C. R., 2002, The first 20 years (1978-1979 to 1998-1999) of active-layer development, Illisarvik experimental drained lake site, western Arctic coast, Canada: Canadian Journal of Earth Sciences, v. 39, no. 11, p. 1657-1674.<http://dx.doi.org/10.1139/e02-068>
- Mamet, S. D., Chun, K. P., Kershaw, G. G. L., Loranty, M. M., and Kershaw, G. P., 2017, Recent Increases in Permafrost Thaw Rates and Areal Loss of Palsas in the Western Northwest Territories, Canada: Permafrost and Periglacial Processes, v. 28, no. 4, p. 619-633.<http://dx.doi.org/10.1002/ppp.1951>
- Maslakov, A., Shabanova, N., Zamolodchikov, D., Volobuev, V., and Kraev, G., 2019, Permafrost Degradation within Eastern Chukotka CALM Sites in the 21st Century Based on CMIP5 Climate Models: Geosciences, v. 9, no. 5.<http://dx.doi.org/10.3390/geosciences9050232>
- Melnikov, E. S., Leibman, M. O., Moskalenko, N. G., and Vasiliev, A. A., 2004, Active-layer monitoring in the cryolithozone of west Siberia: Polar Geography, v. 28, no. 4, p. 267-285.<http://dx.doi.org/10.1080/789610206>
- Miao, Y., Song, C., Sun, L., Wang, X., Meng, H., and Mao, R., 2012, Growing season methane emission from a boreal peatland in the continuous permafrost zone of

- Northeast China: Effects of active layer depth and vegetation: *Biogeosciences*, v. 9, no. 11, p. 4455-4464.<http://dx.doi.org/10.5194/bg-9-4455-2012>
- Nicholas, J. R. J., and Hinkel, K. M., 1996, Concurrent permafrost aggradation and degradation induced by forest clearing, Central Alaska, USA: *Arctic and Alpine Research*, v. 28, no. 3, p. 294-299.<http://dx.doi.org/10.2307/1552108>
- Nicolisky, D. J., Romanovsky, V. E., Panda, S. K., Marchenko, S. S., and Muskett, R. R., 2017, Applicability of the ecosystem type approach to model permafrost dynamics across the Alaska North Slope: *Journal of Geophysical Research-Earth Surface*, v. 122, no. 1, p. 50-75.<http://dx.doi.org/10.1002/2016jf003852>
- Park, H., Fedorov, A. N., Konstantinov, P., and Hiyama, T., 2021, Numerical Assessments of Excess Ice Impacts on Permafrost and Greenhouse Gases in a Siberian Tundra Site Under a Warming Climate: *Frontiers in Earth Science*, v. 9.<http://dx.doi.org/10.3389/feart.2021.704447>
- Prokushkin, A., Hagedorn, F., Pokrovsky, O., Viers, J., Kirilyanov, A., Masyagina, O., Prokushkina, M., and McDowell, W., 2018, Permafrost Regime Affects the Nutritional Status and Productivity of Larches in Central Siberia: *Forests*.<http://dx.doi.org/10.3390/f9060314>
- Quinton, W. L., and Baltzer, J. L., 2013, The active-layer hydrology of a peat plateau with thawing permafrost (Scotty Creek, Canada): *Hydrogeology Journal*, v. 21, no. 1, p. 201-220.<http://dx.doi.org/10.1007/s10040-012-0935-2>
- Raudina, T. V., Loiko, S. V., Kuzmina, D. M., Shirokova, L. S., Kulizhskiy, S. P., Golovatskaya, E. A., and Pokrovsky, O. S., 2021, Colloidal organic carbon and trace

- elements in peat porewaters across a permafrost gradient in Western Siberia: *Geoderma*, v. 390. <http://dx.doi.org/10.1016/j.geoderma.2021.114971>
- Raudina, T. V., Loiko, S. V., Lim, A., Manasypov, R. M., Shirokova, L. S., Istigechev, G. I., Kuzmina, D. M., Kulizhsky, S. P., Vorobyev, S. N., and Pokrovsky, O. S., 2018, Permafrost thaw and climate warming may decrease the CO<sub>2</sub>, carbon, and metal concentration in peat soil waters of the Western Siberia Lowland: *Science of the Total Environment*, v. 634, p. 1004-1023. <http://dx.doi.org/10.1016/j.scitotenv.2018.04.059>
- Ren, B., Hu, Y., and Bu, R., 2022, Vertical distribution patterns and drivers of soil bacterial communities across the continuous permafrost region of northeastern China: *Ecological Processes*, v. 11, no. 1. <http://dx.doi.org/10.1186/s13717-021-00348-8>
- Rodenhizer, H., Ledman, J., Mauritz, M., Natali, S. M., Pegoraro, E., Plaza, C., Romano, E., Schadel, C., Taylor, M., and Schuur, E., 2020, Carbon Thaw Rate Doubles When Accounting for Subsidence in a Permafrost Warming Experiment: *Journal of Geophysical Research-Biogeosciences*, v. 125, no. 6. <http://dx.doi.org/10.1029/2019jg005528>
- Romanovsky, V. E., and Osterkamp, T. E., 2000, Effects of unfrozen water on heat and mass transport processes in the active layer and permafrost: *Permafrost and Periglacial Processes*, v. 11, no. 3, p. 219-239. [http://dx.doi.org/10.1002/1099-1530\(200007/09\)11:3<219::Aid-ppp352>3.0.Co;2-7](http://dx.doi.org/10.1002/1099-1530(200007/09)11:3<219::Aid-ppp352>3.0.Co;2-7)
- Schaefer, K., Liu, L., Parsekian, A., Jafarov, E., Chen, A., Zhang, T., Gusmeroli, A., Panda, S., Zebker, H. A., and Schaefer, T., 2015, Remotely Sensed Active Layer Thickness

- (ReSALT) at Barrow, Alaska Using Interferometric Synthetic Aperture Radar: Remote Sensing, v. 7, no. 4, p. 3735-3759.<http://dx.doi.org/10.3390/rs70403735>
- Serban, M., Li, G. Y., Serban, R. D., Wang, F., Fedorov, A., Vera, S., Cao, Y. P., Chen, P. C., and Wang, W., 2021, Characteristics of the active-layer under the China-Russia Crude Oil pipeline: Journal of Mountain Science, v. 18, no. 2, p. 323-337.<http://dx.doi.org/10.1007/s11629-020-6240-y>
- Shiklomanov, N. I., Streletskiy, D. A., Nelson, F. E., Hollister, R. D., Romanovsky, V. E., Tweedie, C. E., Bockheim, J. G., and Brown, J., 2010, Decadal variations of active-layer thickness in moisture-controlled landscapes, Barrow, Alaska: Journal of Geophysical Research-Biogeosciences, v. 115.<http://dx.doi.org/10.1029/2009jg001248>
- Smith, S. L., Wolfe, S. A., Riseborough, D. W., and Nixon, F. M., 2009, Active-Layer Characteristics and Summer Climatic Indices, Mackenzie Valley, Northwest Territories, Canada: Permafrost and Periglacial Processes, v. 20, no. 2, p. 201-220.<http://dx.doi.org/10.1002/ppp.651>
- Suzuki, K., Park, H., Makarieva, O., Kanamori, H., Hori, M., Matsuo, K., Matsumura, S., Nesterova, N., and Hiyama, T., 2021, Effect of permafrost thawing on discharge of the kolyma river, northeastern siberia: Remote Sensing, v. 13, no. 21.<http://dx.doi.org/10.3390/rs13214389>
- Sysolyatin, R., Serikov, S., Zheleznyak, M., Tikhonravova, Y., Skachkov, Y., Zhizhin, V., and Rojina, M., 2020, Temperature monitoring from 2012 to 2019 in central part of Suntar-Khayat Ridge, Russia: Journal of Mountain Science, v. 17, no. 10, p.

2321-2338.<http://dx.doi.org/10.1007/s11629-020-6175-3>

Tao, J., Koster, R. D., Reichle, R. H., Forman, B. A., Xue, Y., Chen, R. H., and Moghaddam, M., 2019, Permafrost variability over the Northern Hemisphere based on the MERRA-2 reanalysis: *Cryosphere*, v. 13, no. 8, p. 2087-2110.<http://dx.doi.org/10.5194/tc-13-2087-2019>

Tarnocai, C., Nixon, F. M., and Kutny, L., 2004, Circumpolar-active-layer-monitoring (CALM) sites in the Mackenzie Valley, northwestern Canada: Permafrost and Periglacial Processes, v. 15, no. 2, p. 141-153.<http://dx.doi.org/10.1002/ppp.490>

Viereck, L. A., Werdin-Pfisterer, N. R., Adams, P. C., and Yoshikawa, K., Effect of wildfire and fireline construction on the annual depth of thaw in a black spruce permafrost forest in interior Alaska: a 36-year record of recovery, *in* Proceedings Proceedings of the Ninth International Conference on Permafrost, University of Alaska Fairbanks, Fairbanks, Alaska, 2008, Volume 29, p. 1845-1850.

Wang, J., Guo, D., Huang, Y., and Zheng, Z., 1989, A Study on Seasonally Thawed Layer in the Basin of Huola River in Northern Da Hinggan Ling: *Journal of Glaciology and Geocryology*, no. 03, p. 203-214.(In Chinese)

Wang, X., Song, C., Sun, L., Song, Y., Hou, A., and Tan, W., 2021, New progress achieved in seasonal dynamics of dissolved organic carbon of permafrost peatland through Chinese–United States EcoPartnership relationships: *Environmental Progress and Sustainable Energy*, v. 40, no. 5.<http://dx.doi.org/10.1002/ep.13641>

Yang, Y., Liu, H., Wang, Z., Yin, W., Zhang, W., and Ge, Q., 2017, On change laws of permafrost active layer in Daxing'anling Region: *Journal of Heilongjiang Institute*

of Technology, v. 31, no. 1, p.

15-18.<http://dx.doi.org/10.19352/j.cnki.issn1671-4679.2017.01.005> (In Chinese)

Yi, Y., Kimball, J. S., Chen, R. H., Moghaddam, M., Reichle, R. H., Mishra, U., Zona, D., and

Oechel, W. C., 2018, Characterizing permafrost active layer dynamics and sensitivity

to landscape spatial heterogeneity in Alaska: Cryosphere, v. 12, no. 1, p.

145-161.<http://dx.doi.org/10.5194/tc-12-145-2018>

Zhang, T., and Stamnes, K., 1998, Impact of climatic factors on the active layer and

permafrost at Barrow, Alaska: Permafrost and Periglacial Processes, v. 9, no. 3, p.

229-246.[http://dx.doi.org/10.1002/\(SICI\)1099-1530\(199807/09\)9:3<229::AID-PPP28](http://dx.doi.org/10.1002/(SICI)1099-1530(199807/09)9:3<229::AID-PPP28)

6>3.0.CO;2-T

Zhou, Y., Liang, L., Gu, Z., Liang, F., and Zhang, Q., 1993, Effects of Forest on

Hydro-thermal Regime of Frozen Ground, the Northern Part of Da Hinggan Ling:

Journal of Glaciology and Geocryology, no. 01, p. 17-26.(In Chinese)
